# Supplementary material for: Network Pharmacological Analysis on the Herbal Combinations for Mitigating Inflammation in Respiratory Tracts and Experimental Evaluation
Source: MDPI journal article supplement (doi:10.3390/healthcare11010143), 2023-01-03
Supplement: s1 [file s1]

Figure 1: SARS-CoV-2 infection and the pathogenesis of COVID-19. The diagram illustrates the viral life cycle and the resulting inflammatory response. SARS-CoV-2 enters the cell via its spike protein binding to ACE2 and TMPRSS2. The viral genome is released and translated to produce nonstructural proteins (nsps) and structural proteins (S, E, M, N). The viral RNA is then replicated and transcribed. The infection triggers a series of events leading to tissue damage and inflammation. Key pathways include the NF-κB pathway, which is activated by viral proteins and leads to the production of inflammatory cytokines (TNFα, IL-1, IL-6, IL-17, IL-18, IL-19, IL-20, IL-21, IL-22, IL-23, IL-24, IL-25, IL-26, IL-27, IL-28, IL-29, IL-30, IL-31, IL-32, IL-33, IL-34, IL-35, IL-36, IL-37, IL-38, IL-39, IL-40, IL-41, IL-42, IL-43, IL-44, IL-45, IL-46, IL-47, IL-48, IL-49, IL-50, IL-51, IL-52, IL-53, IL-54, IL-55, IL-56, IL-57, IL-58, IL-59, IL-60, IL-61, IL-62, IL-63, IL-64, IL-65, IL-66, IL-67, IL-68, IL-69, IL-70, IL-71, IL-72, IL-73, IL-74, IL-75, IL-76, IL-77, IL-78, IL-79, IL-80, IL-81, IL-82, IL-83, IL-84, IL-85, IL-86, IL-87, IL-88, IL-89, IL-90, IL-91, IL-92, IL-93, IL-94, IL-95, IL-96, IL-97, IL-98, IL-99, IL-100). The diagram also shows the role of various cells (endothelial cells, macrophages, neutrophils, T cells, B cells, etc.) and the resulting tissue damage (vascular smooth muscle contraction, endothelial injury, etc.).

[www.mdpi.com/journal/healthcare](http://www.mdpi.com/journal/healthcare)

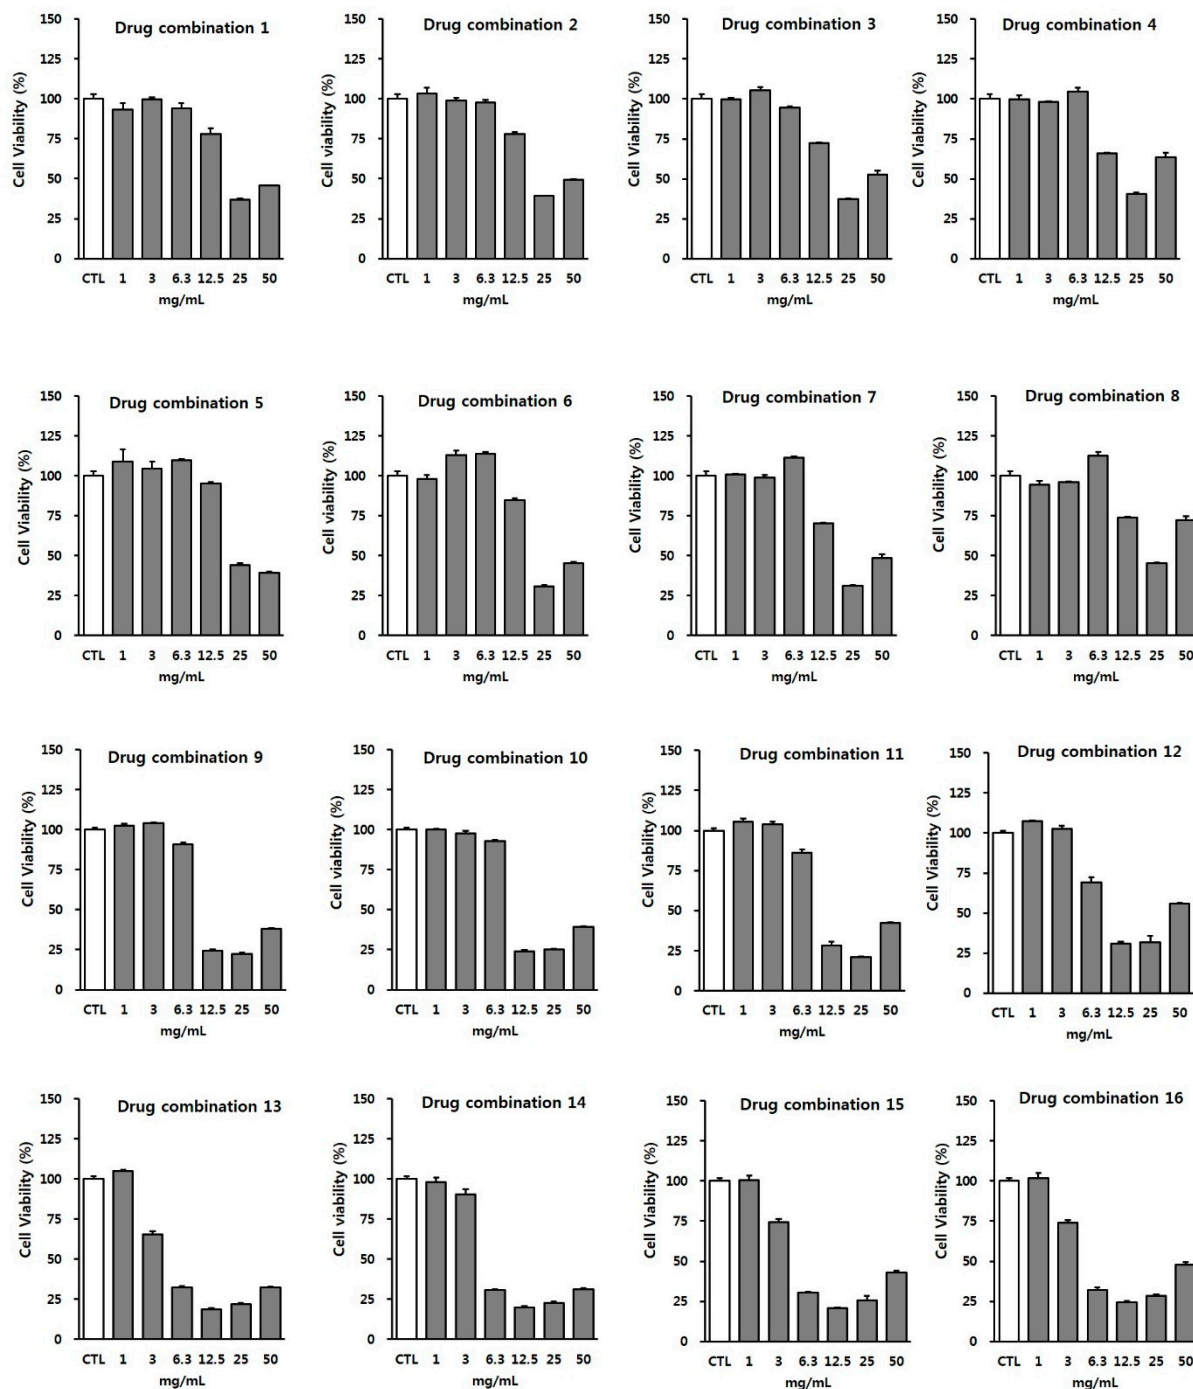

**Supplementary Figure S2.** Viability of the drug combinations in RAW 264.7 cells. RAW 264.7 cells were treated with the drug combinations for 24h. Cell viability was determined using EZ-Cytox assay.

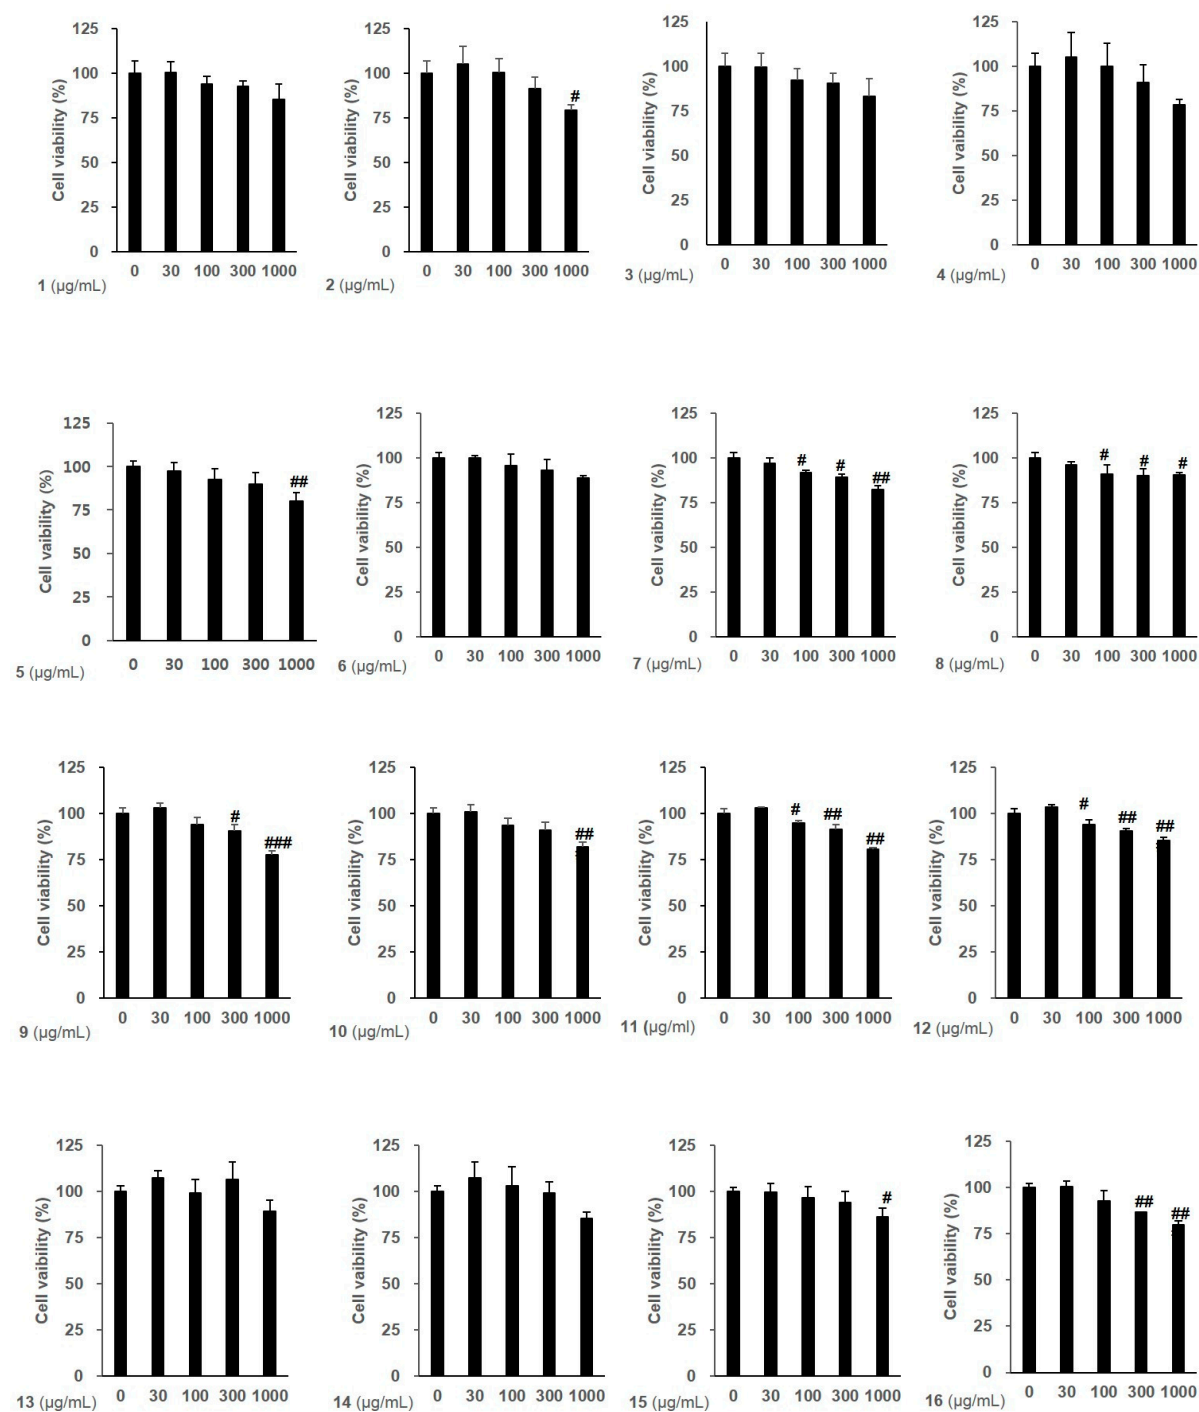

**Supplementary Figure S3. Viability of the drug combinations in NCI-H292 cells.** NCI-H292 cells were treated with various concentrations of the drug combinations for 24 h. Cell viability was determined using the Ez-Cytox kit. The data are presented as mean  $\pm$  SEM (n = 3). # p < 0.05, ## p < 0.01, and ### p < 0.001 compared to non-treated group.
